# Supplementary material for: Facile synthesis of carbon nanotube/natural bentonite composites as a stable catalyst for styrene synthesis
Source: Royal Society of Chemistry journal article supplement (doi:10.1039/b815335c), 2008-01-01

## Supporting Information

### Facile Synthesis of Carbon Nanotube/Natural Bentonite Composites as a Stable Catalyst for Styrene Synthesis

Ali Rinaldi<sup>a,b</sup>, Jian Zhang<sup>a</sup>, Jan Mizera<sup>a</sup>, Frank Girgsdies<sup>a</sup>, Ning Wang<sup>c</sup>, Sharifah Bee Abd Hamid<sup>b</sup>, Robert Schlögl<sup>a</sup>, Dang Sheng Su<sup>\*a</sup>

<sup>a</sup> Department of Inorganic Chemistry, Fritz Haber Institute of the Max Planck Society, Faradayweg 4-6, 14195 Berlin, Germany. E-mail: dangsheng@fhi-berlin.mpg.de; Fax: +49 30 8413 4401.

<sup>b</sup> Combinatorial Technology & Catalysis Research Centre (COMBICAT), Block A, Level 3, Institute of Postgraduate Studies, University of Malaya, 50603 Kuala Lumpur

<sup>c</sup> Hongkong University of Science and Technology, Department of Physics, Clear Water Bay, Hongkong

**Table S1.** Concentrations of chemical elements in the fresh bentonite.

| Elements               | Atomic% | Weight% |
|------------------------|---------|---------|
| O                      | 46.07   | 28.57   |
| Na                     | 0.74    | 0.66    |
| Mg                     | 2.34    | 2.20    |
| Al                     | 9.19    | 9.60    |
| Si                     | 25.41   | 27.66   |
| K                      | 0.97    | 1.46    |
| Ca                     | 4.35    | 6.76    |
| Mn                     | 0.10    | 0.22    |
| Fe                     | 8.76    | 18.97   |
| Ti                     | 1.78    | 3.30    |
| Ni, Cu, Zn, Co, Zr, Sr | <0.09   |         |

**Table S2.** BET surface area of various samples.

| Sample                | BET surface area<br>(m <sup>2</sup> /g) |
|-----------------------|-----------------------------------------|
| As-received bentonite | 88.7                                    |
| Reduced-bentonite     | 10.1                                    |
| CNTs/bentonite        | 33.1                                    |
| Commercial CNTs       | 282                                     |

**Figure S1.** Characterization results of grown carbon nanotubes in CNTs/bentonite composite: (a-b) TEM images (scale bar: 5nm), (c) distribution of the outer diameter, and, (d) DTG and the produced CO<sub>2</sub> profiles in a thermogravimetric analysis. Condition: 5.5mg, 5°C/min, 5% O<sub>2</sub> in Ar.

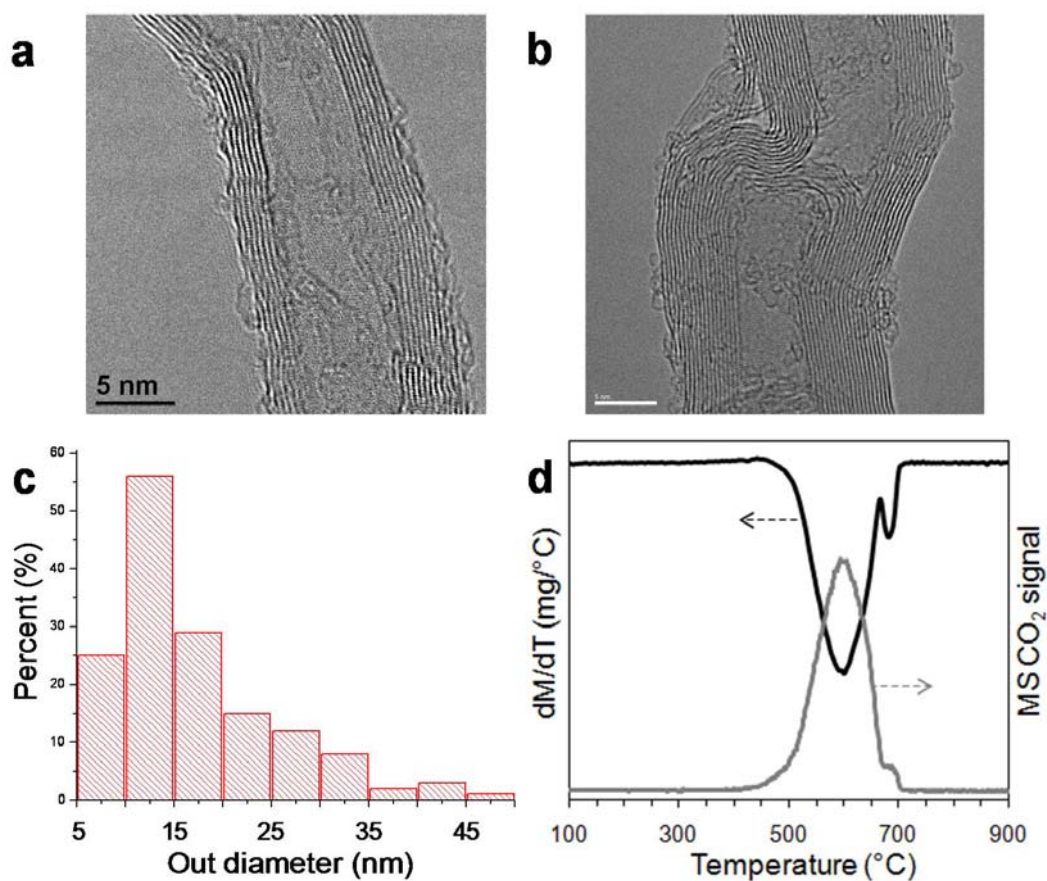

**Figure S2.** Photographs representation of exfoliating sample after synthesis of CNT.

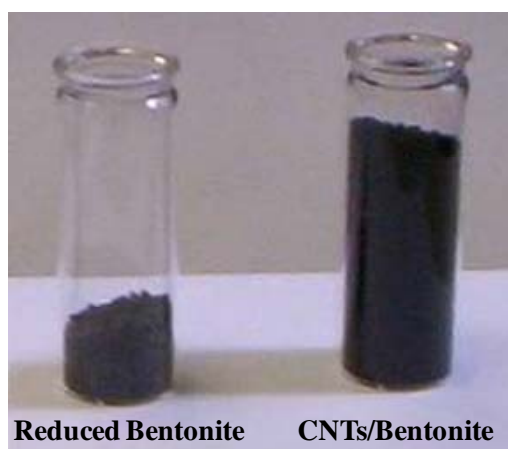

**Figure S3.** Carbon balance of ODH reaction of ethylbenzene on CNT/Bentonite and commercial AC in Fig. 5.

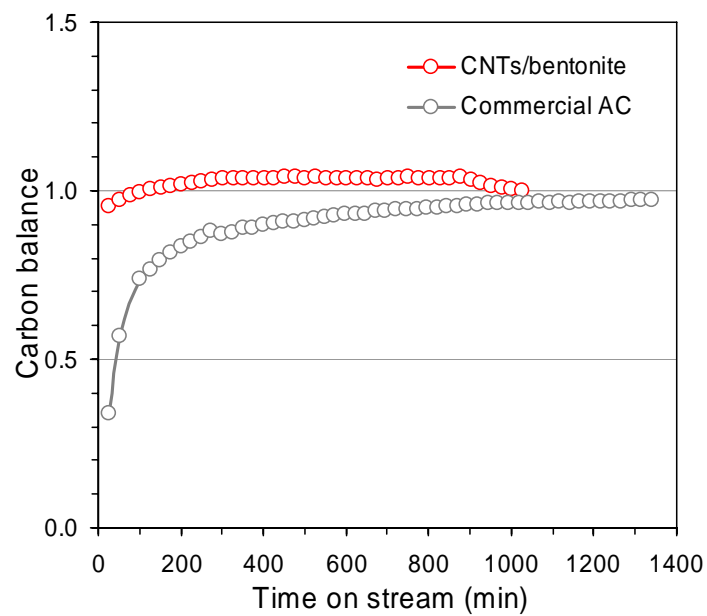

**Figure S4.** TEM images of CNTs and CNTs-encapsulated Fe particles after ODH reaction in Fig. 5.

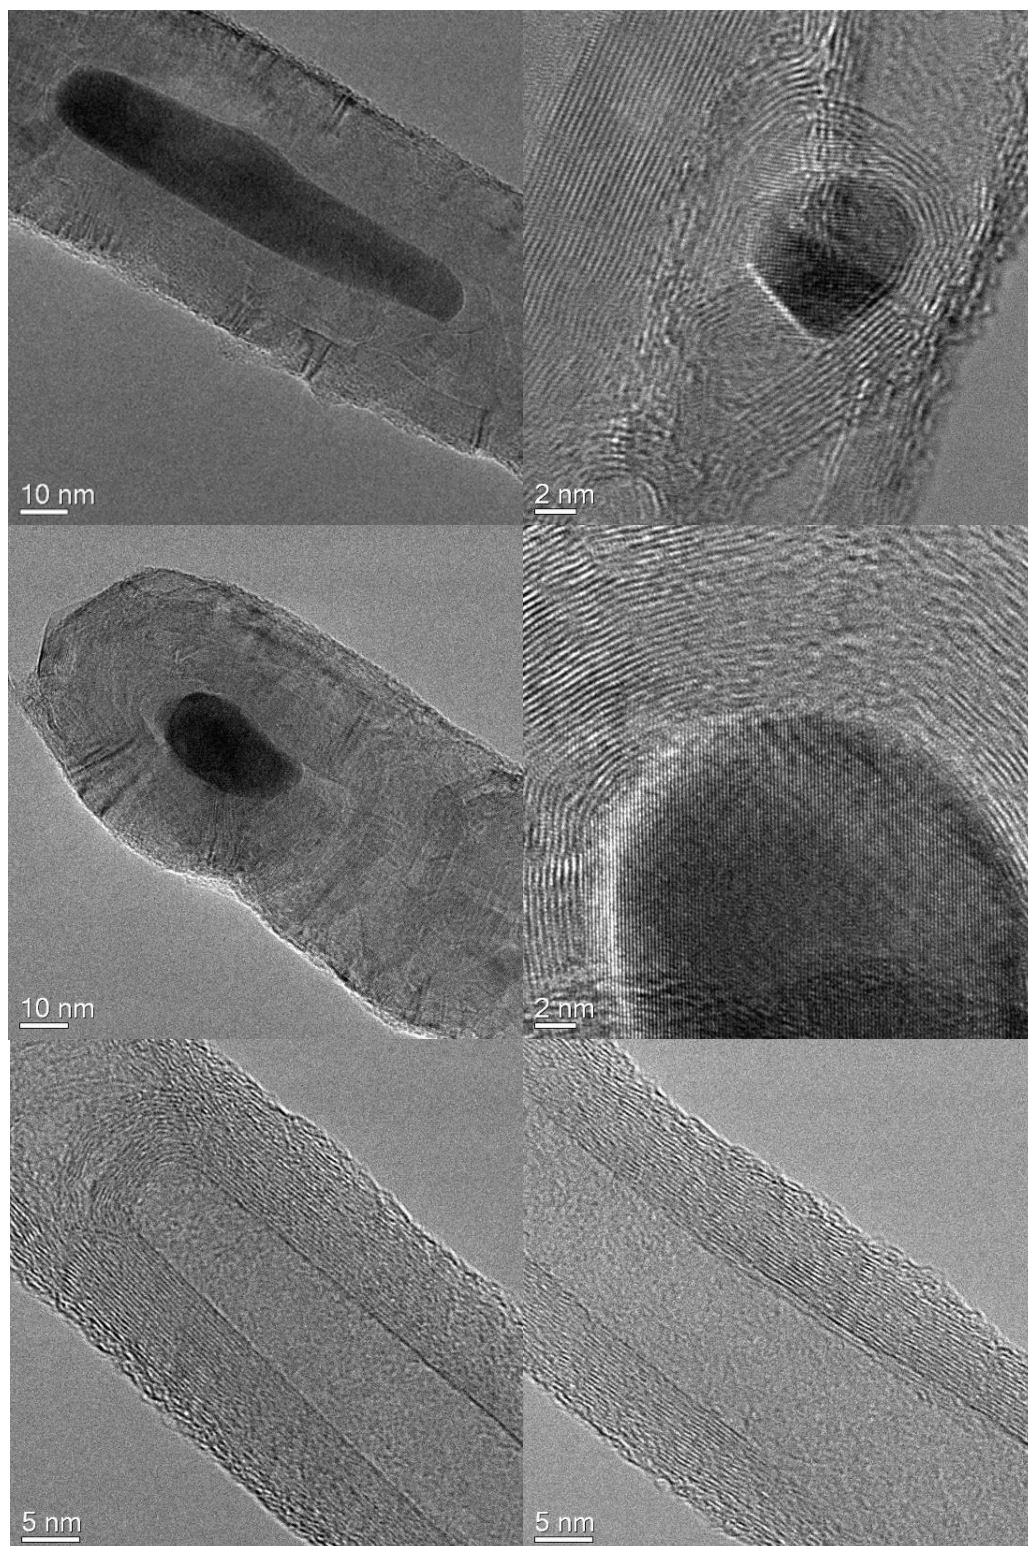

Supplement: b815335c.pdf [file b815335c.pdf]
